# Supplementary material
Source: Springer Nature journal article supplement (https://www.springermedizin.de/resource/supplementary/12887_2007_182_MOESM2_ESM.pdf/9477560)

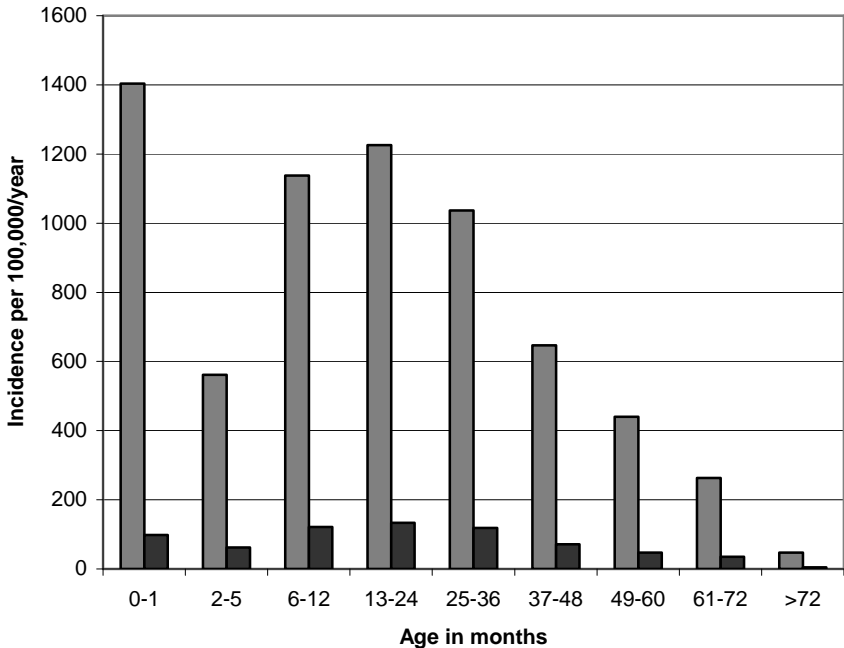

■ Incidence of acute seizures ■ Incidence of status epilepticus

Supplement: MOESM2 [file 9477560]
